# Supplementary material
Source: PubMed Central journal article supplement (PMC7033722)
Supplement: develop-147-183301-s1.pdf [file develop-147-183301-s1.pdf]

## E10.5 - Rostral

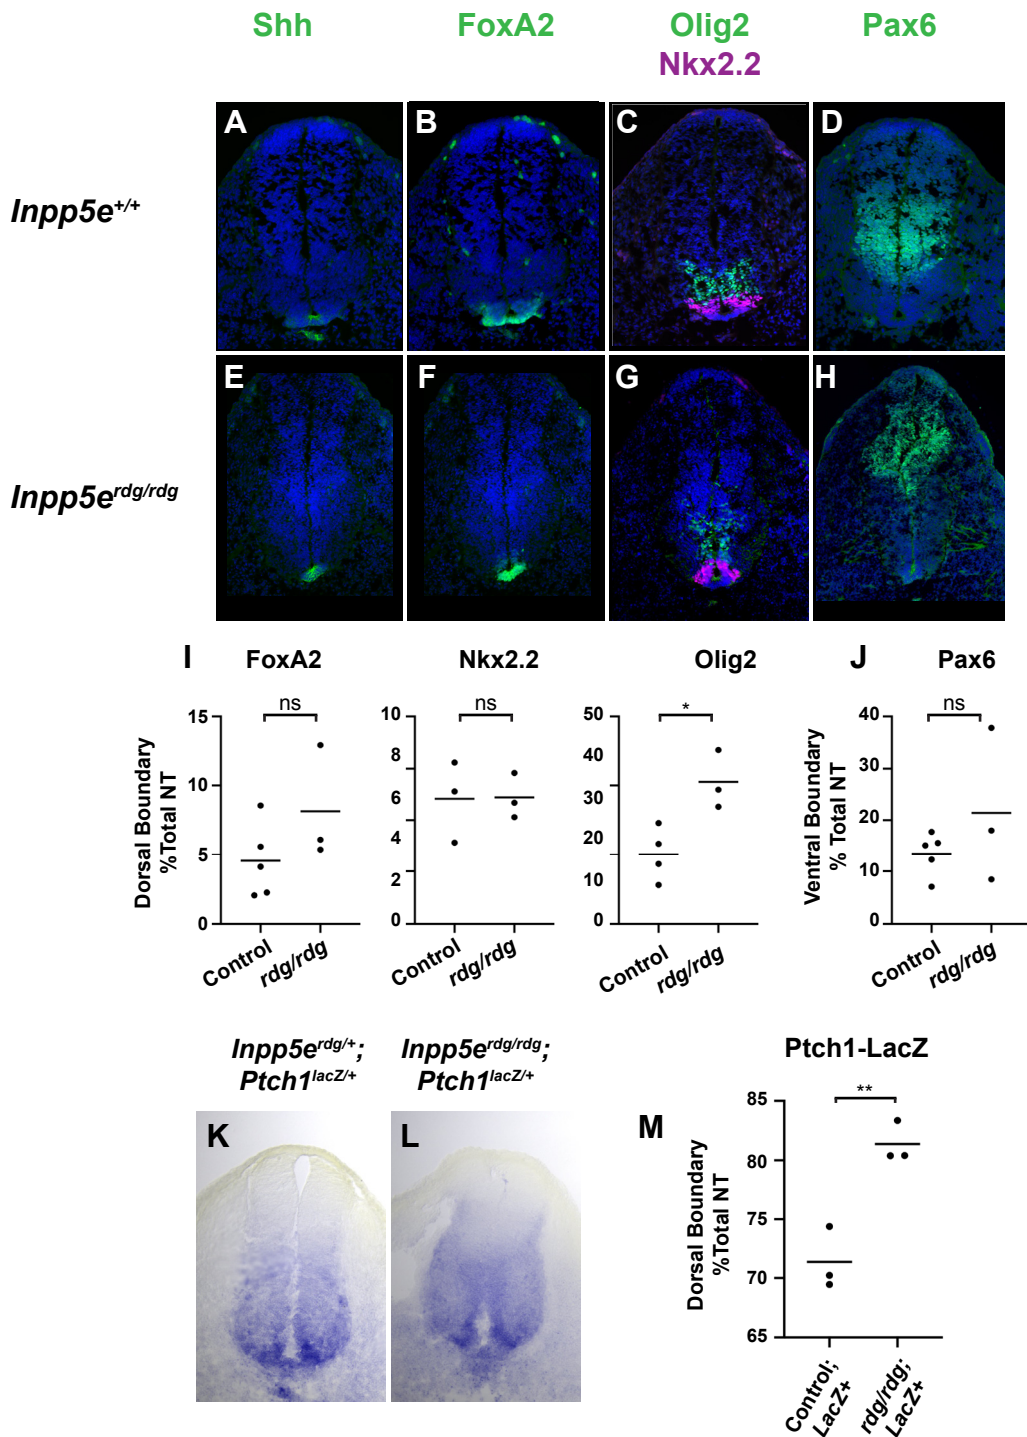

**Figure S1. Response to Shh is varied along the rostral-caudal axis.** Rostral (forelimb) sections of E10.5 neural tube. (A-C, E-G) Shh, FoxA2 and Nkx2.2 domains are comparable to control embryos (control n=5, *Inpp5e*<sup>rdg/rdg</sup> n=3). (C, G) Olig2 domain shows an expanded dorsal boundary. (I-J) Quantification of dorsal and ventral boundary as a percentage of total lumen distance. (K, L) Rostral (forelimb) neural tube sections of *Inpp5e*<sup>rdg/+</sup>; *Ptch1*<sup>LacZ/+</sup> (n=3) and *Inpp5e*<sup>rdg/rdg</sup>; *Ptch1*<sup>LacZ/+</sup> embryos (n=3) stained for β-galactosidase activity. (K-L) *Inpp5e*<sup>rdg/rdg</sup>; *Ptch1*<sup>LacZ/+</sup> mutants display a dorsal expansion of β-galactosidase activity in the neural tube. (M) Quantification of K and L. Bar indicates mean of biological replicates. Analyzed by two tailed unpaired t-test with Welch's correction. \*p<0.05, \*\*p<0.01. ns, not significant.

## E10.5 - HL

*Inpp5e*<sup>+/+</sup> or  
*Inpp5e*<sup>rdg/+</sup>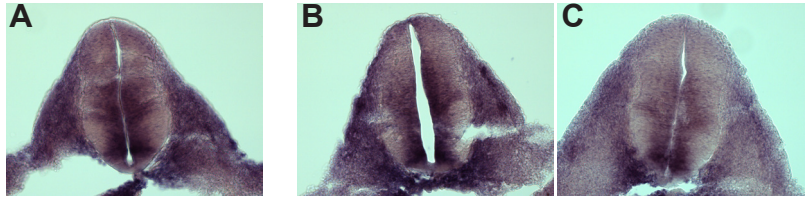*Inpp5e*<sup>rdg/rdg</sup>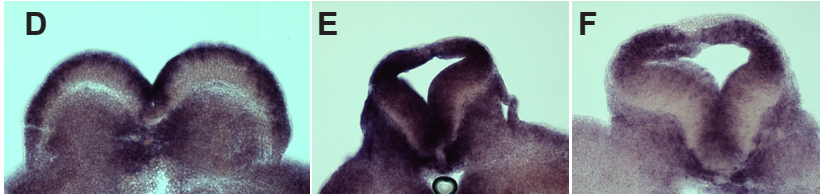

G

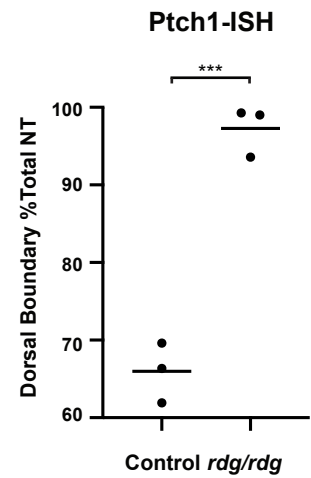

## E10.5 - FL

*Inpp5e*<sup>+/+</sup> or  
*Inpp5e*<sup>rdg/+</sup>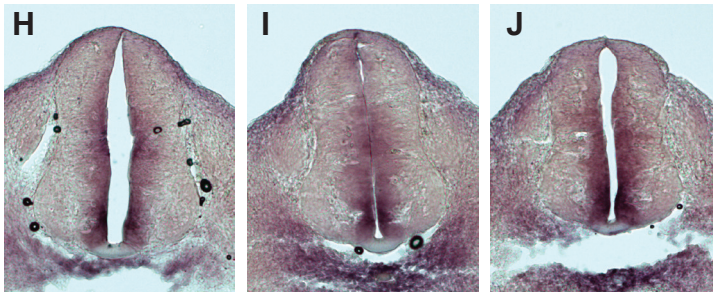*Inpp5e*<sup>rdg/rdg</sup>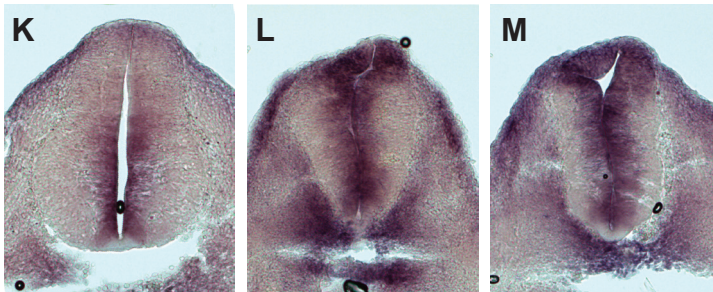

N

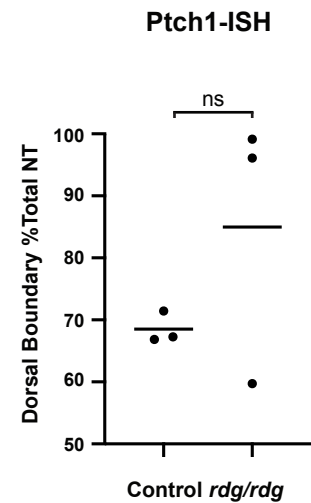

**Figure S2. *Patched1* is expressed more dorsally in *Inpp5e*<sup>rdg/rdg</sup>.** *Patched1* *in situ* hybridization of caudal (hindlimb) and rostral (forelimb) sections of E10.5 neural tube (control n=3, *Inpp5e*<sup>rdg/rdg</sup> n=3). (A-F) *Patched1* expression extends more dorsally in caudal sections of *Inpp5e*<sup>rdg/rdg</sup> embryos. (G) Quantification of dorsal boundary as a percentage of total lumen distance. (H-M) *Patched1* expression of rostral (forelimb) sections shows more variability in dorsal boundary. (M) Quantification of H-M. Bar indicates mean of biological replicates. Analyzed by two tailed unpaired t-test with Welch's correction. \*\*\*p<0.001. ns, not significant.

## E10.5

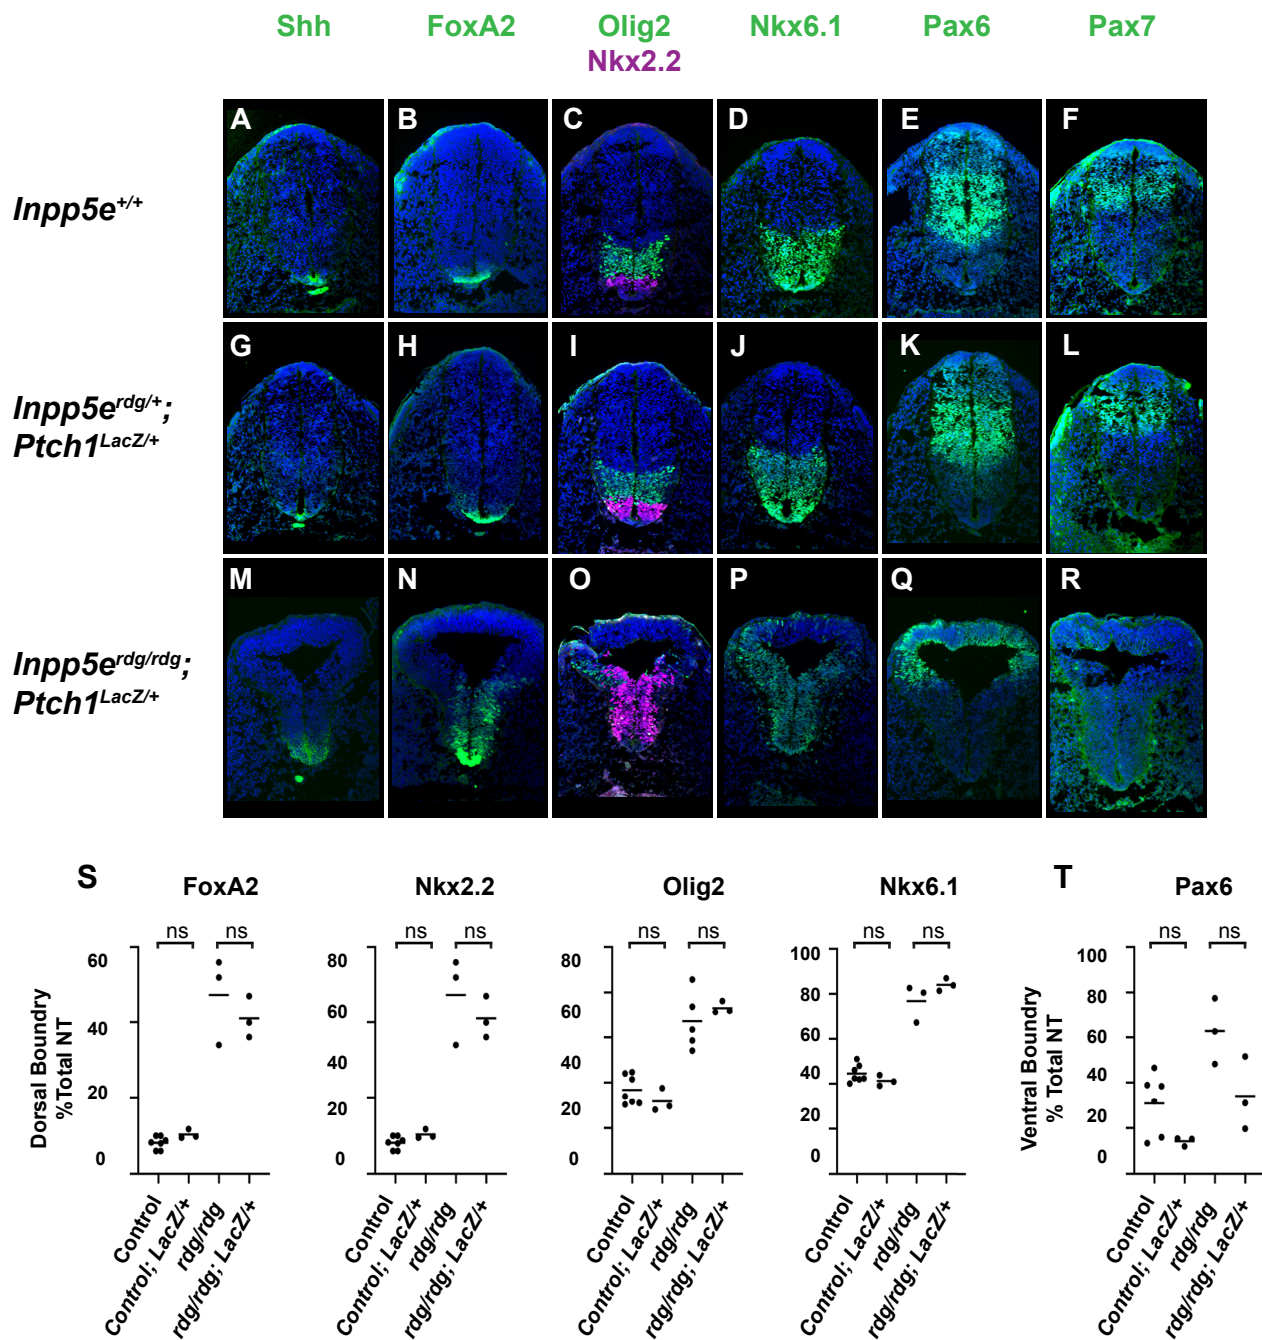

**Figure S3. Ventral neural progenitor marker expression of *Inpp5e*<sup>rdg/rdg</sup>; *Ptch1*<sup>LacZ/+</sup> mutant embryos is indistinguishable from *Inpp5e*<sup>rdg/rdg</sup> animals.** Caudal (hindlimb) sections of E10.5 neural tube. (A-L) *Inpp5e*<sup>rdg/+</sup>; *Ptch1*<sup>LacZ/+</sup> mutant embryos show similar expression of the cell markers indicated when compared to wild type (wild type n=2, *Inpp5e*<sup>rdg/+</sup>; *Ptch1*<sup>LacZ/+</sup> n=3). (M-P) *Inpp5e*<sup>rdg/rdg</sup>; *Ptch1*<sup>LacZ/+</sup> mutant embryos (n=3) show expanded expression of ventral cell fates compared to both wild type and *Inpp5e*<sup>rdg/+</sup>; *Ptch1*<sup>LacZ/+</sup> mutant embryos. (Q) Ventral boundary of Pax 6 staining is dorsally shifted in *Inpp5e*<sup>rdg/rdg</sup>; *Ptch1*<sup>LacZ/+</sup>. (R) Pax7 staining is absent in *Inpp5e*<sup>rdg/rdg</sup>; *Ptch1*<sup>LacZ/+</sup> embryos. (S-T) Quantitation of dorsal and ventral boundary as a percentage of total lumen distance. Bar indicates mean of biological replicates. Analyzed by ANOVA using Tukey correction for multiple comparisons. ns, not significant.

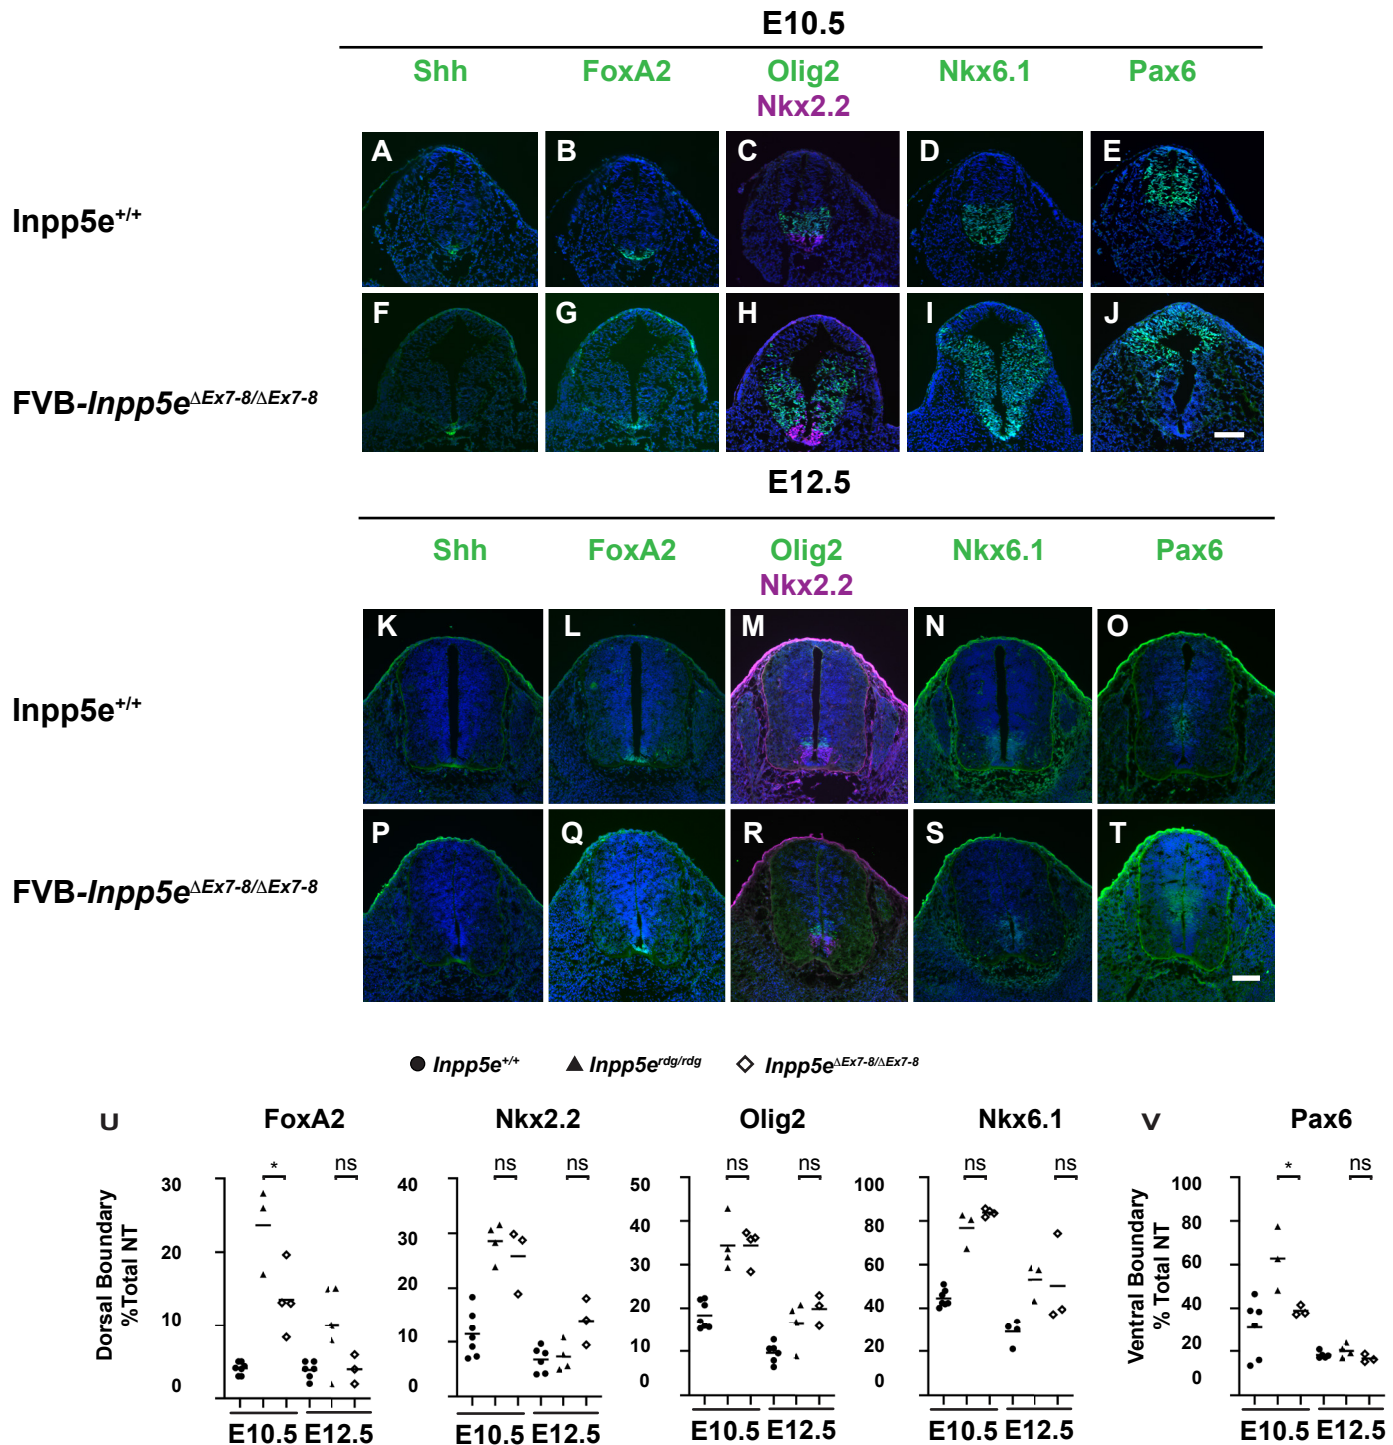

**Figure S4. FVB-*Inpp5e*<sup>ΔEx7-8/ΔEx7-8</sup> embryos show expanded ventral cell fates at E10.5 and recovery at E12.5.** Caudal (hindlimb) E10.5 and E12.5 neural tube sections stained with antibodies against indicated cell fates. (A-J) E10.5 FVB-*Inpp5e*<sup>ΔEx7-8/ΔEx7-8</sup> mutants show expanded ventral cell fates and Shh activity similar to *Inpp5e*<sup>rdg/rdg</sup> mutants (Fig. 1F-J) (control n=6, FVB-*Inpp5e*<sup>ΔEx7-8/ΔEx7-8</sup> n=4). (K-T) At E12.5, these expanded cell fates have returned to normal, with few cells scattered dorsally (control n=6, FVB-*Inpp5e*<sup>ΔEx7-8/ΔEx7-8</sup> n=3). Scale bars: 100μm. (U-V) Quantitation of dorsal and ventral boundary as a percentage of total lumen distance. Bar indicates mean of biological replicates analyzed by ANOVA using Tukey correction for multiple comparisons. Circles represent control, triangles indicate *Inpp5e*<sup>rdg/rdg</sup> and diamonds represent FVB-*Inpp5e*<sup>ΔEx7-8/ΔEx7-8</sup>. \*p<0.05. ns, not significant.

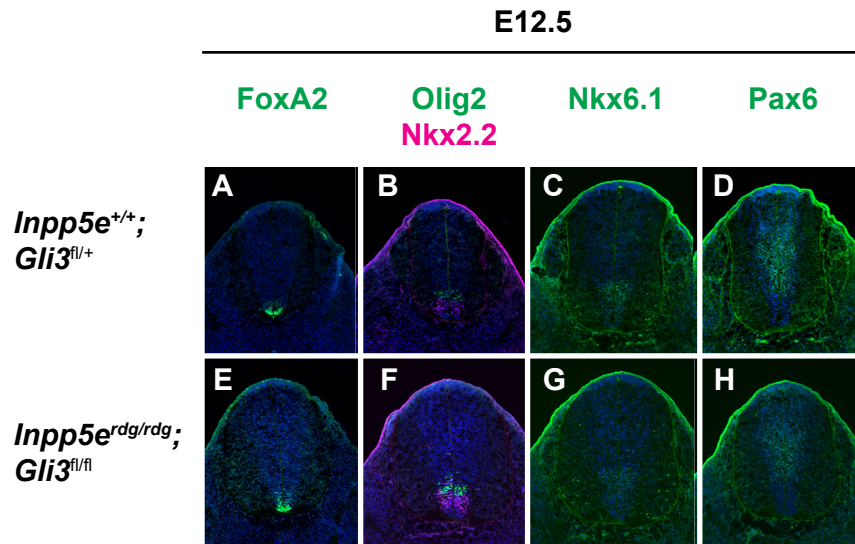

**Figure S5. *Gli3* background has no effect on *Inpp5e*<sup>+/+</sup> and *Inpp5e*<sup>rdg/rdg</sup> phenotype.** Caudal (hindlimb) sections of E12.5 *Inpp5e*<sup>+/+</sup>;*Gli3*<sup>fl/+</sup> (control) (A-D, n=2) and *Inpp5e*<sup>rdg/rdg</sup>;*Gli3*<sup>fl/fl</sup> (E-H, n=2). Expression of markers in littermate control and *Inpp5e*<sup>rdg/rdg</sup>;*Gli3*<sup>fl/fl</sup> sections is comparable to corresponding genotype in Fig 2.
